# Supplementary material for: A53T-Alpha-Synuclein Overexpression Impairs Dopamine Signaling and Striatal Synaptic Plasticity in Old Mice
Source: PLoS One. 2010 Jul 7;5(7):e11464. doi: 10.1371/journal.pone.0011464 (PMC2898885; doi:10.1371/journal.pone.0011464)
Supplement: Table S3 — Independent validation of transcriptional dysregulation of dopamine-induced genes by qPCR. Striatal mRNA expression levels in old PrPmtA and PrPmtB mouse brains were documented. Significant changes are highlighted with arrows, the significance values is illustrated by asterisks (* p<0.05; ** p<0.01; *** p<0.001). N = 4 per genotype. (0.03 MB XLS) [file pone.0011464.s006.xls]

## Sheet: suppl.table3
Supplemental Table 3:
Independent validation of transcriptional dysregulation of dopamine-induced genes by qPCR
Applied Biosystems	Striatum				Gene Symbol	Gene Title
TaqMan Assay ID	PrPmtA vs. WT / old age		PrPmtB vs. WT / old age
Mm00833804_g1	-19.14% ± 7.48% (*)	(p=0.0299; n=7 (vs. 6)	-31.14% ± 7.32% (**)	(p=0.0014; n=7 (vs. 6)	Atf2	activating transcription factor 2
Mm00432621_s1	-31.67% ± 11.17% (*)	(p=0.0471; n=3 (vs. 3)	no alteration	(p>0.05; n=4 (vs. 3)	Cnr1 (=Cb1)	cannabinoid receptor 1
Mm00516275_m1	-54.67% ± 6.22% (***)	(p<0.0001; n=6 (vs. 6)	-19.46% ± 8.18% (*)	(p=0.0348; n=8 (vs. 6)	Homer1	homer homolog 1 (Drosophila)
Mm00450009_m1	no alteration	(p>0.05; n=3 (vs. 3)	-28.25% ± 9.80% (*)	(p=0.0344; n=4 (vs. 3)	Pde7b	phosphodiesterase 7B
